# Supplementary material for: Hypoglycemic Effects of Novel Panax notoginseng Polysaccharide in Mice with Diet-Induced Obesity
Source: MDPI journal article supplement (doi:10.3390/foods11193101), 2022-10-05
Supplement: s1 [file s1]

# Supplementary Materials

## Hypoglycemic Effects of Novel *Panax notoginseng* Polysaccharide in Mice with Diet-Induced Obesity

**Table S1.** Food intakes and the contents of LDL-C, HDL-C, TG, TC, insulin, and HbA1c in the HFD-induced obese mice.

| Groups         | Food in-<br>take<br>(g/kg/d) | LDL-C<br>( $\mu$ M) | HDL-C<br>(mM)   | TG (mM)         | TC (mM)         | Insulin (mM)     | HbA1c (mM)         |
|----------------|------------------------------|---------------------|-----------------|-----------------|-----------------|------------------|--------------------|
| ND             | 182 $\pm$ 27                 | 0.26 $\pm$ 0.06     | 3.82 $\pm$ 0.23 | 1.28 $\pm$ 0.26 | 3.14 $\pm$ 0.32 | 17.8 $\pm$ 1.57  | 172.34 $\pm$ 15.38 |
| HF             | 112 $\pm$ 18                 | 0.31 $\pm$ 0.04     | 4.92 $\pm$ 0.42 | 1.58 $\pm$ 0.06 | 4.32 $\pm$ 0.22 | 19.53 $\pm$ 2.18 | 218.22 $\pm$ 30.21 |
| 50 $\mu$ g/mL  | 108 $\pm$ 19                 | 0.30 $\pm$ 0.05     | 4.52 $\pm$ 0.23 | 1.72 $\pm$ 0.09 | 3.41 $\pm$ 0.32 | 18.26 $\pm$ 3.12 | 163.52 $\pm$ 12.59 |
| 100 $\mu$ g/mL | 118 $\pm$ 21                 | 0.32 $\pm$ 0.06     | 4.61 $\pm$ 0.27 | 1.91 $\pm$ 0.46 | 3.27 $\pm$ 0.26 | 18.64 $\pm$ 1.94 | 181.47 $\pm$ 19.63 |
| 200 $\mu$ g/mL | 107 $\pm$ 22                 | 0.30 $\pm$ 0.12     | 4.91 $\pm$ 0.32 | 1.68 $\pm$ 0.16 | 3.51 $\pm$ 0.18 | 17.52 $\pm$ 1.37 | 171.43 $\pm$ 15.29 |
